# Supplementary material for: Role of the BAHD1 Chromatin-Repressive Complex in Placental Development and Regulation of Steroid Metabolism
Source: PLOS journal article supplement (doi:10.1371/journal.pgen.1005898), 2016-03-03
Supplement: S10 (10.1371/journal.pgen.1005898.s010) [file journal.pgen.1005898.s010]

**Table S3: Genes differentially expressed in *Bahd1*-KO placentas compared to *Bahd1*-WT placentas at both E16.5 and E18.5 stages**

| Up-regulated genes |                                                                                                                           |
|--------------------|---------------------------------------------------------------------------------------------------------------------------|
| GENE_SYMBOL        | Name                                                                                                                      |
| A2M                | alpha-2-macroglobulin                                                                                                     |
| ABP1               | amiloride binding protein 1 (amine oxidase, copper-containing)                                                            |
| ACOX3              | acyl-Coenzyme A oxidase 3, pristanoyl                                                                                     |
| ADAMTS2            | a disintegrin-like and metalloproteinase (reprolysin type) with thrombospondin type 1 motif, 2                            |
| ADAMTS5            | similar to a disintegrin-like and metalloproteinase (reprolysin type) with thrombospondin type 1 motif, 5 (aggrecanase-2) |
| ADM                | adrenomedullin                                                                                                            |
| AES                | amino-terminal enhancer of split                                                                                          |
| AIF1L              | allograft inflammatory factor 1-like                                                                                      |
| AMPD3              | adenosine monophosphate deaminase 3                                                                                       |
| ANGPTL2            | angiopoietin-like 2                                                                                                       |
| ANO1               | anoctamin 1, calcium activated chloride channel                                                                           |
| ANTXR1             | anthrax toxin receptor 1                                                                                                  |
| ANXA8              | annexin A8                                                                                                                |
| ANXA9              | annexin A9                                                                                                                |
| APOC3              | apolipoprotein C-III                                                                                                      |
| AQP1               | aquaporin 1                                                                                                               |
| ARL4D              | ADP-ribosylation factor-like 4D; hypothetical protein LOC100044157                                                        |
| ASRGL1             | asparaginase like 1                                                                                                       |
| ATP6VOD2           | ATPase, H <sup>+</sup> transporting, lysosomal V0 subunit D2                                                              |
| ATP8B1             | ATPase, class I, type 8B, member 1                                                                                        |
| B3GALNT1           | UDP-GalNAc:betaGlcNAc beta 1,3-galactosaminyltransferase, polypeptide 1                                                   |
| BMP8A              | bone morphogenetic protein 8a                                                                                             |
| BNIP3              | BCL2/adenovirus E1B interacting protein 3                                                                                 |
| BTBD3              | BTB (POZ) domain containing 3                                                                                             |
| C1QA               | complement component 1, q subcomponent, alpha polypeptide                                                                 |
| CCND2              | cyclin D2                                                                                                                 |
| CD109              | CD109 antigen                                                                                                             |
| CD55               | CD55 antigen                                                                                                              |
| CDH13              | cadherin 13                                                                                                               |
| CDKN1A             | cyclin-dependent kinase inhibitor 1A (P21)                                                                                |
| CDO1               | cysteine dioxygenase 1, cytosolic                                                                                         |
| CFLAR              | CASP8 and FADD-like apoptosis regulator pseudogene; CASP8 and FADD-like apoptosis regulator                               |
| CHST11             | carbohydrate sulfotransferase 11                                                                                          |
| CHST12             | carbohydrate sulfotransferase 12                                                                                          |
| CLDN1              | claudin 1                                                                                                                 |
| CLDN5              | claudin 5                                                                                                                 |
| CLEC2D             | C-type lectin domain family 2, member d                                                                                   |
| COCH               | coagulation factor C homolog (Limulus polyphemus)                                                                         |
| CPE                | carboxypeptidase E; similar to carboxypeptidase E                                                                         |
| CRABP1             | cellular retinoic acid binding protein I                                                                                  |
| CRABP2             | cellular retinoic acid binding protein II                                                                                 |
| CTSK               | cathepsin K                                                                                                               |
| CTSO               | cathepsin O                                                                                                               |
| CTSS               | cathepsin S                                                                                                               |
| CXCL14             | chemokine (C-X-C motif) ligand 14                                                                                         |
| CYP11A1            | cytochrome P450, family 11, subfamily a, polypeptide 1                                                                    |
| DCAF4              | WD repeat domain 21                                                                                                       |
| DEGS2              | degenerative spermatocyte homolog 2 (Drosophila), lipid desaturase                                                        |
| DNAJC18            | DnaJ (Hsp40) homolog, subfamily C, member 18                                                                              |
| DTNA               | dystrobrevin alpha                                                                                                        |
| ECHDC2             | enoyl Coenzyme A hydratase domain containing 2                                                                            |
| EGLN3              | EGL nine homolog 3 (C. elegans)                                                                                           |
| EMCN               | endomucin                                                                                                                 |
| EMILIN2            | elastin microfibril interfacer 2                                                                                          |
| EPDR1              | ependymin related protein 1 (zebrafish)                                                                                   |
| ERV3               | endogenous retroviral sequence 3                                                                                          |
| ESR1               | estrogen receptor 1 (alpha)                                                                                               |
| FABP4              | fatty acid binding protein 4, adipocyte                                                                                   |
| FAM135B            | family with sequence similarity 135, member B                                                                             |
| FAM174B            | family with sequence similarity 174, member B                                                                             |
| FAM20C             | family with sequence similarity 20, member C                                                                              |
| FBLN2              | fibulin 2                                                                                                                 |
| FCER1G             | Fc receptor, IgE, high affinity I, gamma polypeptide                                                                      |
| FMO2               | flavin containing monooxygenase 2                                                                                         |
| FSTL1              | folliculin-like 1                                                                                                         |
| FZD1               | frizzled homolog 1 (Drosophila)                                                                                           |
| GADD45G            | growth arrest and DNA-damage-inducible 45 gamma                                                                           |
| GALC               | galactosylceramidase                                                                                                      |
| GATM               | glycine amidinotransferase (L-arginine:glycine amidinotransferase)                                                        |
| GDPD1              | glycerophosphodiester phosphodiesterase domain containing 1                                                               |
| GGTA1              | glycoprotein galactosyltransferase alpha 1, 3                                                                             |
| GJA1               | gap junction protein, alpha 1                                                                                             |
| GKN2               | gastrokin 2                                                                                                               |
| GLIPR1             | GLI pathogenesis-related 1 (glioma)                                                                                       |
| GNG11              | guanine nucleotide binding protein (G protein), gamma 11                                                                  |
| GPIHBP1            | GPI-anchored HDL-binding protein 1                                                                                        |
| GNPMB              | glycoprotein (transmembrane) nmb                                                                                          |
| GPX8               | glutathione peroxidase 8 (putative)                                                                                       |
| GRAMD1B            | GRAM domain containing 1B                                                                                                 |
| GRAP               | GRB2-related adaptor protein                                                                                              |
| GSDMD              | gasdermin D                                                                                                               |
| GZMC               | granzyme C                                                                                                                |
| GZMD               | granzyme D                                                                                                                |
| GZMG               | granzyme G                                                                                                                |
| H2-Q6              | histocompatibility 2, Q region locus 6                                                                                    |
| H2-T22             | histocompatibility 2, T region locus 22                                                                                   |
| HAND2              | heart and neural crest derivatives expressed transcript 2                                                                 |
| HBA-X              | hemoglobin X, alpha-like embryonic chain in Hba complex                                                                   |
| HBB-Y              | similar to beta-globin; hemoglobin Y, beta-like embryonic chain                                                           |
| HOXA11             | homeo box A11                                                                                                             |

|          |                                                                                                      |
|----------|------------------------------------------------------------------------------------------------------|
| HOXD10   | homeo box D10                                                                                        |
| HPGD     | hydroxyprostaglandin dehydrogenase 15 (NAD)                                                          |
| HPSE     | heparanase                                                                                           |
| HSPB7    | heat shock protein family, member 7 (cardiovascular)                                                 |
| HSPB8    | heat shock protein 8                                                                                 |
| HTRA1    | HtrA serine peptidase 1                                                                              |
| HTRA3    | HtrA serine peptidase 3                                                                              |
| IFITM3   | interferon induced transmembrane protein 3                                                           |
| IGFBP3   | insulin-like growth factor binding protein 3                                                         |
| INMT     | indolethylamine N-methyltransferase                                                                  |
| INPP5A   | inositol polyphosphate-5-phosphatase A                                                               |
| INSIG2   | insulin induced gene 2                                                                               |
| JAM2     | junction adhesion molecule 2                                                                         |
| KLK15    | kallikrein related-peptidase 15                                                                      |
| LBP      | lipopolysaccharide binding protein                                                                   |
| LCN2     | lipocalin 2                                                                                          |
| LY6G6C   | lymphocyte antigen 6 complex, locus G6C                                                              |
| MASP1    | mannan-binding lectin serine peptidase 1                                                             |
| MATN2    | matrilin 2                                                                                           |
| MFAP5    | microfibrillar associated protein 5                                                                  |
| MGP      | matrix Gla protein                                                                                   |
| MLPH     | melanophilin                                                                                         |
| MMP11    | matrix metallopeptidase 11                                                                           |
| MMP14    | matrix metallopeptidase 14 (membrane-inserted)                                                       |
| MMP2     | matrix metallopeptidase 2                                                                            |
| MMP23    | matrix metallopeptidase 23                                                                           |
| MRGPRG   | MAS-related GPR, member G                                                                            |
| MUSTN1   | musculoskeletal, embryonic nuclear protein 1                                                         |
| MXRA8    | matrix-remodelling associated 8                                                                      |
| MYO5A    | myosin VA                                                                                            |
| NAMPT    | nicotinamide phosphoribosyltransferase                                                               |
| NBL1     | neuroblastoma, suppression of tumorigenicity 1                                                       |
| NMB      | neuromedin B                                                                                         |
| NPR2     | natriuretic peptide receptor 2                                                                       |
| NPY      | neuropeptide Y                                                                                       |
| OSBPL5   | oxysterol binding protein-like 5                                                                     |
| P2RX4    | purinergic receptor P2X, ligand-gated ion channel 4                                                  |
| PADI2    | peptidyl arginine deiminase, type II; similar to peptidyl arginine deiminase, type II                |
| PAM      | peptidylglycine alpha-amidating monooxygenase                                                        |
| PAMR1    | peptidase domain containing associated with muscle regeneration 1                                    |
| PBX1     | pre B-cell leukemia transcription factor 1                                                           |
| PDLIM3   | PDZ and LIM domain 3                                                                                 |
| PGR      | progesterone receptor                                                                                |
| PHLDA3   | pleckstrin homology-like domain, family A, member 3                                                  |
| PI15     | peptidase inhibitor 15                                                                               |
| PKNOX2   | Pbx/knotted 1 homeobox 2                                                                             |
| PLA1A    | phospholipase A1 member A                                                                            |
| PLEKHO1  | pleckstrin homology domain containing, family O member 1                                             |
| PLEKHO2  | pleckstrin homology domain containing, family O member 2                                             |
| PLXND1   | plexin D1                                                                                            |
| PPP2R5A  | similar to protein phosphatase 2, regulatory subunit B (B56)                                         |
| PQLC3    | PQ loop repeat containing                                                                            |
| PRAP1    | proline-rich acidic protein 1                                                                        |
| PRL8A2   | prolactin family 8, subfamily a, member 2                                                            |
| PRSS35   | protease, serine, 35                                                                                 |
| PSMB9    | proteasome (prosome, macropain) subunit, beta type 9 (large multifunctional peptidase 2)             |
| PTGS1    | prostaglandin-endoperoxide synthase 1                                                                |
| PTRH1    | peptidyl-tRNA hydrolase 1 homolog (S. cerevisiae)                                                    |
| QPCT     | glutaminyl-peptide cyclotransferase (glutaminyl cyclase)                                             |
| RAB31    | RAB31, member RAS oncogene family                                                                    |
| RAB32    | RAB32, member RAS oncogene family                                                                    |
| RAMP1    | receptor (calcitonin) activity modifying protein 1                                                   |
| RAMP3    | receptor (calcitonin) activity modifying protein 3; similar to receptor activity modifying protein 3 |
| RASGRP3  | RAS, guanyl releasing protein 3                                                                      |
| RGS2     | regulator of G-protein signaling 2                                                                   |
| RHO      | rhodopsin                                                                                            |
| RHOJ     | ras homolog gene family, member J                                                                    |
| RIMKLB   | ribosomal modification protein rimK-like family member B; similar to mKIAA1238 protein               |
| RRM1     | ribonucleotide reductase M1                                                                          |
| RUNX1    | runx related transcription factor 1                                                                  |
| S100A4   | hippocampus abundant transcript-like 1; S100 calcium binding protein A4                              |
| SCGB1A1  | secretoglobin, family 1A, member 1 (uteroglobin)                                                     |
| SCMH1    | sex comb on midleg homolog 1                                                                         |
| SERPING1 | serine (or cysteine) peptidase inhibitor, clade G, member 1                                          |
| SETD7    | SET domain containing (lysine methyltransferase) 7                                                   |
| SEZ6L    | seizure related 6 homolog like                                                                       |
| SFRP4    | secreted frizzled-related protein 4                                                                  |
| SFRP5    | secreted frizzled-related sequence protein 5                                                         |
| SGK1     | serum/glucocorticoid regulated kinase 1                                                              |
| SGPL1    | sphingosine phosphate lyase 1                                                                        |
| SIRPA    | signal-regulatory protein alpha                                                                      |
| SLC25A29 | solute carrier family 25 (mitochondrial carrier, palmitoylcarnitine transporter), member 29          |
| SLC44A1  | solute carrier family 44, member 1                                                                   |
| SLC6A12  | solute carrier family 6 (neurotransmitter transporter, betaine/GABA), member 12                      |
| SLC05A1  | solute carrier organic anion transporter family, member 5A1                                          |
| SLPI     | secretory leukocyte peptidase inhibitor                                                              |
| SMOC2    | SPARC related modular calcium binding 2                                                              |
| SORBS2   | sorbin and SH3 domain containing 2                                                                   |
| SPHK1    | sphingosine kinase 1                                                                                 |
| SPON1    | spondin 1, (f-spondin) extracellular matrix protein                                                  |
| SPP1     | secreted phosphoprotein 1                                                                            |
| SQRDL    | sulfide quinone reductase-like (yeast)                                                               |
| SRGN     | serglycin                                                                                            |
| SWAP70   | SWA-70 protein                                                                                       |
| SYNE2    | synaptic nuclear envelope 2                                                                          |
| TACC1    | transforming, acidic coiled-coil containing protein 1                                                |

|           |                                                                          |
|-----------|--------------------------------------------------------------------------|
| TCP11L2   | t-complex 11 (mouse) like 2                                              |
| TDO2      | tryptophan 2,3-dioxygenase                                               |
| TFF3      | trefoil factor 3, intestinal                                             |
| TFPI2     | tissue factor pathway inhibitor 2                                        |
| THY1      | thymus cell antigen 1, theta                                             |
| TLR4      | toll-like receptor 4                                                     |
| TMEM100   | transmembrane protein 100                                                |
| TMEM150A  | transmembrane protein 150                                                |
| TMEM50A   | transmembrane protein 50A                                                |
| TNFRSF11B | tumor necrosis factor receptor superfamily, member 11b (osteoprotegerin) |
| TNFRSF1B  | tumor necrosis factor receptor superfamily, member 1b                    |
| TNFSF9    | tumor necrosis factor (ligand) superfamily, member 9                     |
| TREM2     | triggering receptor expressed on myeloid cells 2                         |
| TRPS3INP1 | transformation related protein 53 inducible nuclear protein 1            |
| TSPAN5    | tetraspanin 5                                                            |
| TXNIP     | thioredoxin interacting protein                                          |
| TYROBP    | TYRO protein tyrosine kinase binding protein                             |
| UGCG      | UDP-glucose ceramide glucosyltransferase                                 |
| USP1      | ubiquitin specific peptidase 1; predicted gene 5841                      |
| USP53     | ubiquitin specific peptidase 53                                          |
| VASN      | vasorin                                                                  |
| VEZF1     | vascular endothelial zinc finger 1                                       |
| VLDLR     | very low density lipoprotein receptor                                    |
| WEE1      | WEE 1 homolog 1 (S. pombe)                                               |
| WT1       | similar to Wilms tumor homolog; Wilms tumor 1 homolog                    |
| XDH       | xanthine dehydrogenase                                                   |
| XPA       | xeroderma pigmentosum, complementation group A                           |
| ZFP36L1   | zinc finger protein 36, C3H type-like 1                                  |

**Down-regulated genes**

GENE\_SYMBOL Name

|           |                                                                |
|-----------|----------------------------------------------------------------|
| ADA       | adenosine deaminase                                            |
| ALDH1A3   | aldehyde dehydrogenase family 1, subfamily A3                  |
| BAHD1     | Bromo adjacent homology domain protein 1                       |
| BHLHE41   | basic helix-loop-helix family, member e41                      |
| CAR2      | carbonic anhydrase 2                                           |
| CCR1L1    | chemokine (C-C motif) receptor 1-like 1                        |
| ETS2      | E26 avian leukemia oncogene 2, 3' domain                       |
| FABP6     | fatty acid binding protein 6, ileal (gastrotropin)             |
| FGG       | fibrinogen gamma chain                                         |
| FHL3      | four and a half LIM domains 3                                  |
| FSTL3     | folliculin-like 3                                              |
| GCM1      | glial cells missing homolog 1 (Drosophila)                     |
| GHRH      | growth hormone releasing hormone                               |
| GJB5      | gap junction protein, beta 5                                   |
| GPD2      | glycerol phosphate dehydrogenase 2, mitochondrial              |
| GPR1      | G protein-coupled receptor 1                                   |
| HGD       | homogentisate 1, 2-dioxygenase                                 |
| HSD17B2   | hydroxysteroid (17-beta) dehydrogenase 2                       |
| HSD17B7   | hydroxysteroid (17-beta) dehydrogenase 7                       |
| HSPA5     | heat shock protein 5                                           |
| LEPR      | leptin receptor                                                |
| LGALS9    | lectin, galactose binding, soluble 9                           |
| MFSD2A    | major facilitator superfamily domain containing 2              |
| MUC1      | mucin 1, transmembrane                                         |
| NOSTRIN   | nitric oxide synthase trafficker                               |
| NPPC      | natriuretic peptide precursor type C                           |
| NUAK1     | NUAK family, SNF1-like kinase, 1                               |
| PGA5      | pepsinogen 5, group I                                          |
| PITRM1    | pitrilysin metalloproteinase 1                                 |
| PKLR      | pyruvate kinase liver and red blood cell                       |
| PLAT      | plasminogen activator, tissue                                  |
| PRL3C1    | prolactin family 3, subfamily c, member 1                      |
| PRL7A1    | prolactin family 7, subfamily a, member 1                      |
| PRL7C1    | prolactin family 7, subfamily c, member 1; predicted gene 2544 |
| PSTPIP1   | proline-serine-threonine phosphatase-interacting protein 1     |
| PYGL      | liver glycogen phosphorylase                                   |
| SERPINB9C | serine (or cysteine) peptidase inhibitor, clade B, member 9c   |
| SH3KBP1   | SH3-domain kinase binding protein 1                            |
| ST6GAL1   | beta galactoside alpha 2,6 sialyltransferase 1                 |
| STRA6     | stimulated by retinoic acid gene 6                             |
| TFR3      | transferrin receptor                                           |
| TMEM54    | transmembrane protein 54                                       |
| TNFRSF9   | tumor necrosis factor receptor superfamily, member 9           |
| TUBB3     | tubulin, beta 3; tubulin, beta 3, pseudogene 1                 |
| UBA6      | ubiquitin-like modifier activating enzyme 6                    |
| UPP1      | uridine phosphorylase 1                                        |
